# Supplementary material
Source: publisher site journal article supplement (https://www.dovepress.com/article/245766)
Supplement: Supplementary file 1 [file get_supplementary_file.php]

1 **Supplementary materials**

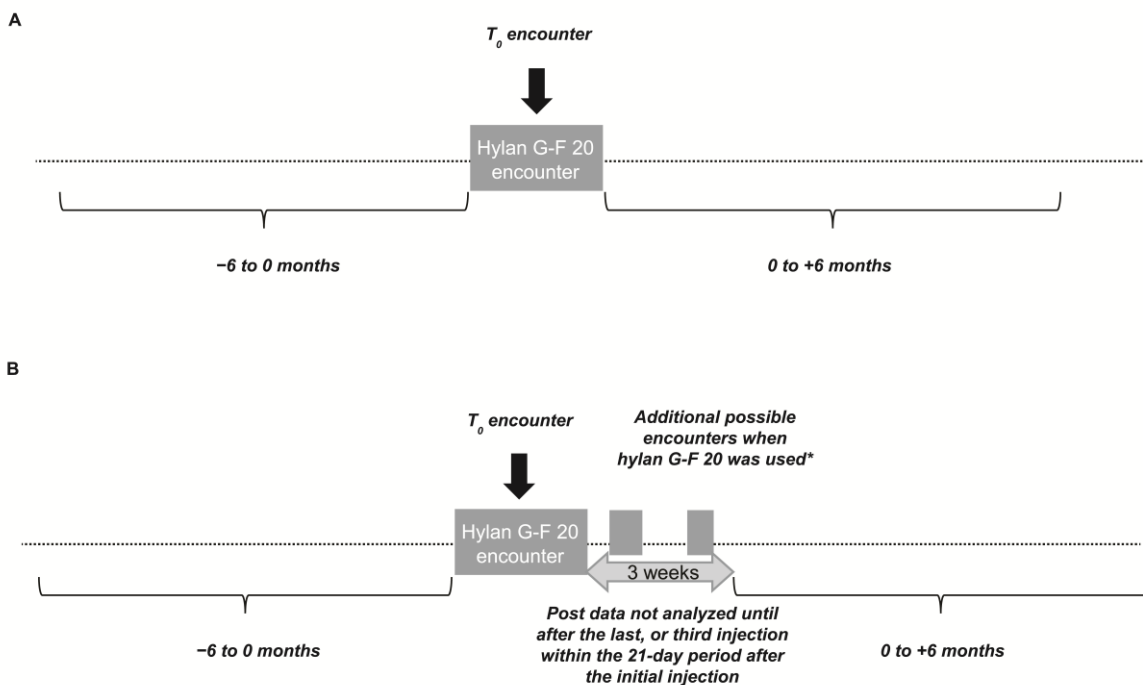

2

3 **Supplementary figure 1 (A, B) (A)** hylan G-F 20 single IA injection and **(B)** hylan G-F 20 treatment  
4 regimens.

5 **Notes:** \*Initial hylan G-F 20 treatment was defined as 1–3 injections of hylan G-F 20 (2 mL) over  
6 the course of 21 days.

7 **Abbreviation:** IA, intra-articular.

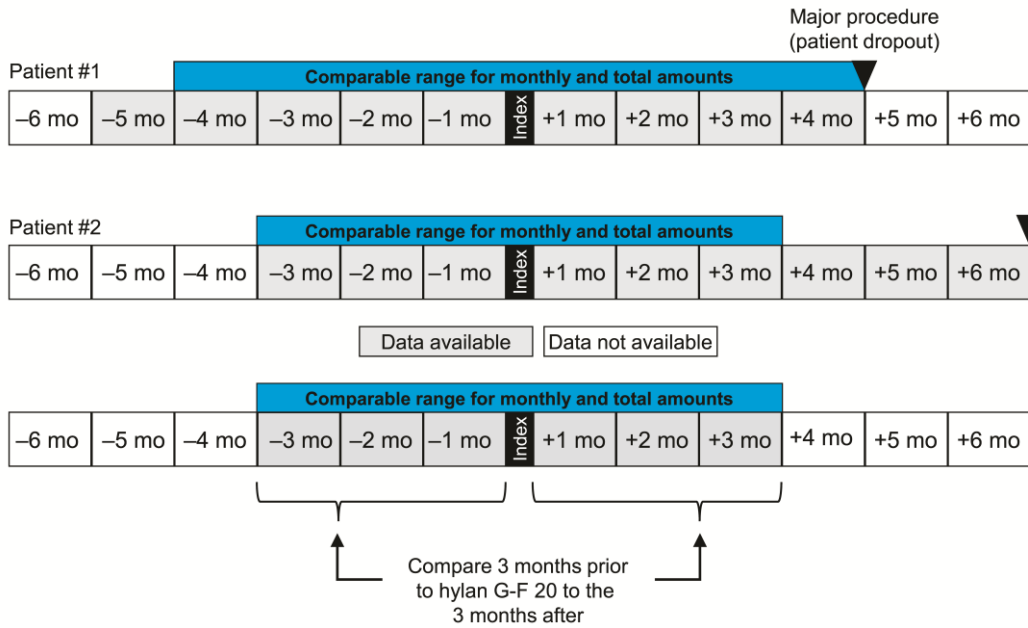

8

9 **Supplementary figure 2** Symmetric analysis of data from patients with <6 months of data.

10 **Notes:** The maximum time, in months, with data available both before *and* after index treatment  
 11 defined the data range utilized for each patient (see “Comparable range for monthly and total  
 12 amounts” indicator bar; data outside of this time period was not utilized). Shaded cells indicate  
 13 data are available; non-shaded cells that data are not available.

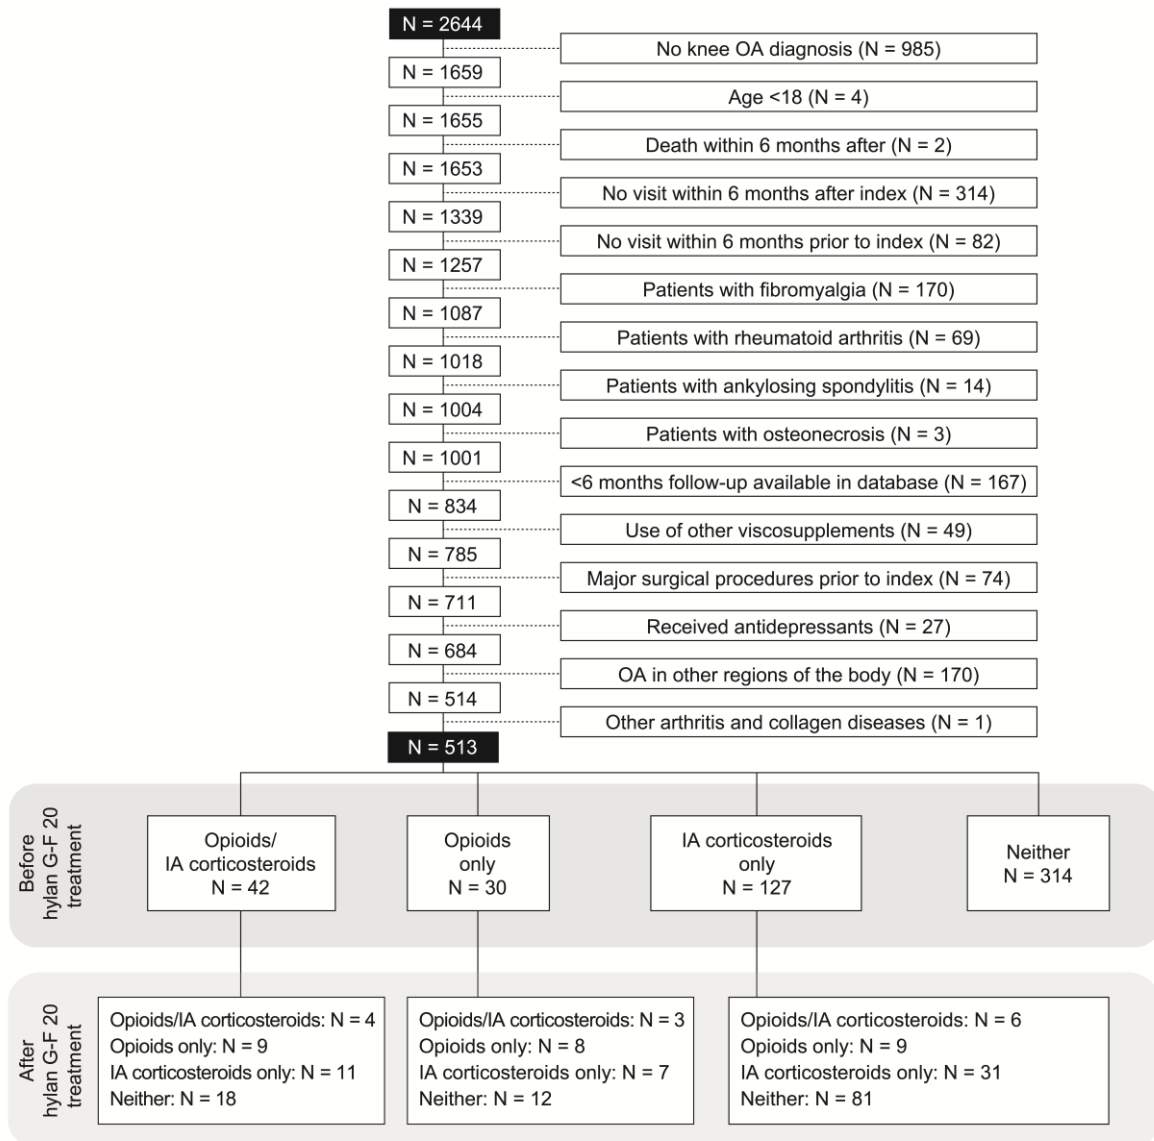

14

15 **Supplementary figure 3** Patient disposition for N = 2644 patients who received hylan G-F 20  
 16 between January 1, 2000 and March 31, 2016.

17 **Abbreviations:** IA, intra-articular; OA, osteoarthritis.

18
